# Supplementary material for: Hierarchical Sn-MFI zeolites prepared by facile top-down methods for sugar isomerisation
Source: Royal Society of Chemistry journal article supplement (doi:10.1039/c4cy00172a), 2014-01-01
Supplement: c4cy00172a1.pdf [file c4cy00172a1.pdf]

## Electronic Supplementary Information

### Hierarchical Sn-MFI zeolites prepared by facile top-down methods for sugar isomerisation

Pierre Y. Dapsens,<sup>a</sup> Cecilia Mondelli,<sup>a\*</sup> Jakub Jagielski,<sup>a</sup> R. Hauert<sup>b</sup> and Javier Pérez-Ramírez<sup>a\*</sup>

<sup>a</sup>Institute for Chemical and Bioengineering, Department of Chemistry and Applied Biosciences, ETH Zurich, Vladimir-Prelog-Weg 1, CH-8093 Zurich, Switzerland. Fax: +41 44 6331405 Tel: +41 44 6337120; E-mails: cecilia.mondelli@chem.ethz.ch; jpr@chem.ethz.ch.

<sup>b</sup>Empa, Swiss Federal Laboratories for Materials Science and Technology, Überlandstrasse 129, CH-8600 Dübendorf, Switzerland.

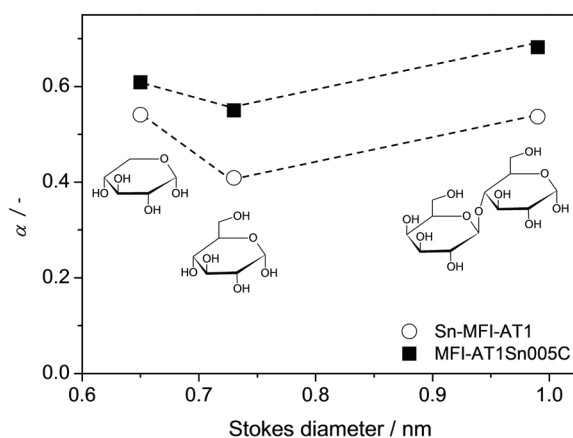

**Fig. S11**  $\alpha$  (defined below) versus the Stokes diameter of the substrates for catalysts prepared *via* alkaline-treatment (Sn-MFI-AT1) and alkaline-assisted stannation (MFI-AT1Sn005C). The parameter  $\alpha$  reflects the advantage of using a hierarchical with respect to a purely microporous Sn-containing material in the isomerisation of the three sugars. The Stokes diameter is the effective diameter of the substrates in water as determined in previous studies (Qi et al., *Bioresour. Technol.*, 2011, **102**, 7111; Shaffer et al., *Adv. Powder. Technol.*, 2011, **22**, 454).

$$\alpha = \frac{\text{Yield of isomer at } t = 15 \text{ min over the post-synthesis treated sample}}{\text{Yield of isomer at equilibrium over the post-synthesis treated sample}} - \frac{\text{Yield of isomer at } t = 15 \text{ min over Sn-MFI-P}}{\text{Yield of isomer at equilibrium over Sn-MFI-P}}$$

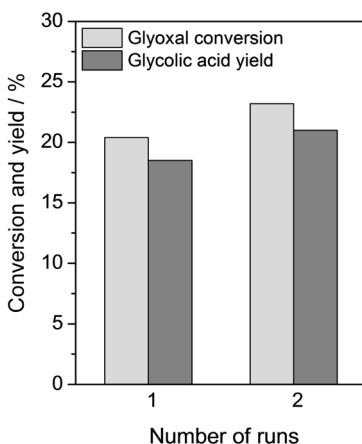

**Fig. S12.** Conversion of glyoxal and yield of glycolic acid over MFI-AT1Sn005C at 363 K and 24 h in two consecutive catalytic runs.

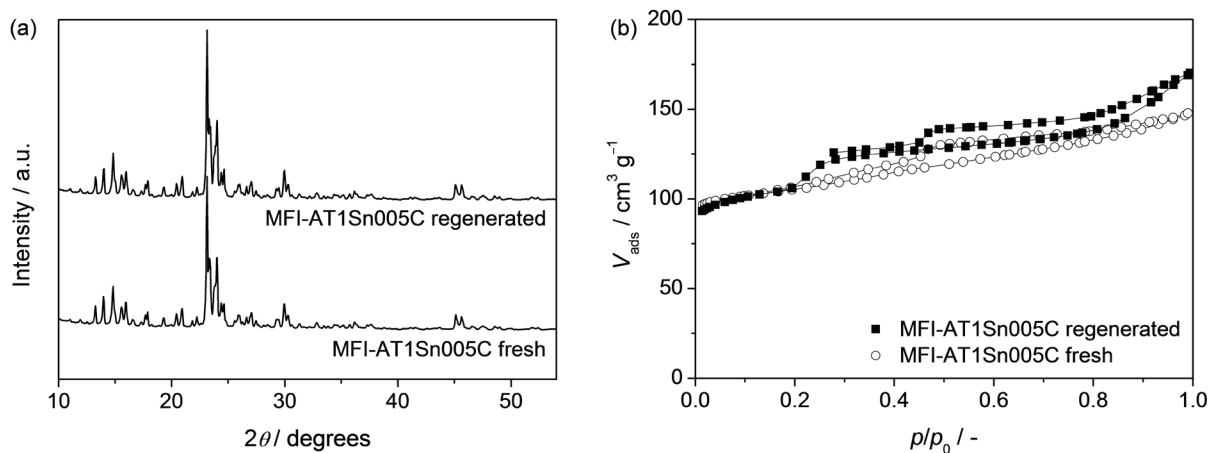

**Fig. S13.** (a) X-ray diffraction patterns and (b) N<sub>2</sub> isotherms of MFI-AT1Sn005C in fresh form and after regeneration through calcination (823 K, 5 K min<sup>-1</sup>, 5 h) in flowing air.

**Table S11** Yield of isomers (xylulose, fructose, and lactulose) over selected catalysts.

| Substrate | Catalyst      | Isomer yield at $t = 15$ min | Isomer yield at $t = 2$ h |
|-----------|---------------|------------------------------|---------------------------|
| Xylose    | Sn-MFI-AT1    | 6.5                          | 8.5                       |
|           | MFI-AT1Sn005C | 6.9                          | 8.2                       |
| Glucose   | Sn-MFI-AT1    | 9.5                          | 23.2                      |
|           | MFI-AT1Sn005C | 13.1                         | 23.8                      |
| Lactose   | Sn-MFI-AT1    | 12.1                         | 22.5                      |
|           | MFI-AT1Sn005C | 17.0                         | 24.5                      |

[1]
